# Supplementary material
Source: ML conference proceedings conference paper supplement (https://proceedings.neurips.cc/paper_files/paper/2010/hash/9b04d152845ec0a378394003c96da594-Abstract.html)
Supplement: Supplementary file [file 9b04d152845ec0a378394003c96da594-Supplemental.zip]

## A Proofs for “Tight Sample Complexity of Large-Margin Learning” (S. Sabato, N. Srebro and N. Tishby)

### A.1 Proof of Lemma 3.3

*Proof.* The inequality  $k_\gamma \leq k_{\alpha\gamma}$  is trivial from the definition of  $k_\gamma$ . For the other inequality, note first that we can always let  $\mathbb{E}_{X \sim D_X}[XX']$  be diagonal by rotating the axes w.l.o.g. . Therefore  $k_\gamma = \min\{k \mid \sum_{i=k+1}^d \lambda_i \leq \gamma^2 k\}$ . Since  $k_\gamma \leq k_{\alpha\gamma}$ , we have  $\gamma^2 k_\gamma \geq \sum_{i=k_\gamma+1}^d \lambda_i \geq \sum_{i=k_{\alpha\gamma}+1}^d \lambda_i$ . In addition, by the minimality of  $k_{\alpha\gamma}$ ,  $\sum_{i=k_{\alpha\gamma}}^d \lambda_i > \alpha^2 \gamma^2 (k_{\alpha\gamma} - 1)$ . Thus  $\sum_{i=k_{\alpha\gamma}+1}^d \lambda_i > \alpha^2 \gamma^2 (k_{\alpha\gamma} - 1) - \lambda_{k_{\alpha\gamma}}$ . Combining the inequalities we get  $\gamma^2 k_\gamma > \alpha^2 \gamma^2 (k_{\alpha\gamma} - 1) - \lambda_{k_{\alpha\gamma}}$ . In addition, if  $k_\gamma < k_{\alpha\gamma}$  then  $\gamma^2 k_\gamma \geq \sum_{i=k_{\alpha\gamma}}^d \lambda_i \geq \lambda_{k_{\alpha\gamma}}$ . Thus, either  $k_\gamma = k_{\alpha\gamma}$  or  $2\gamma^2 k_\gamma > \alpha^2 \gamma^2 (k_{\alpha\gamma} - 1)$ .  $\square$

### A.2 Details omitted from the proof of Theorem 4.2

The proof of Theorem 4.2 is complete except for the construction of  $\tilde{X}$  and  $\tilde{P}$  in the first paragraph, which is disclosed here in full, using the following lemma:

**Lemma A.1.** *Let  $S = (X_1, \dots, X_m)$  be a sequence of elements in  $\mathbb{R}^d$ , and let  $X$  be a  $m \times d$  matrix whose rows are the elements of  $S$ . If  $S$  is  $\gamma$ -shattered, then for every  $\epsilon > 0$  there is a column vector  $r \in \mathbb{R}^d$  such that for every  $y \in \{\pm 1\}^m$  there is a  $w_y \in \mathbf{B}_{1+\epsilon}^{d+1}$  such that  $\tilde{X}w_y = y$ , where  $\tilde{X} = (X \quad r)$ .*

*Proof.* if  $S$  is  $\gamma$ -shattered then there exists a vector  $r \in \mathbb{R}^d$ , such that for all  $y \in \{\pm 1\}^m$  there exists  $w_y \in \mathbf{B}_1^d$  such that for all  $i \in [m]$ ,  $y_i(\langle X_i, w_y \rangle - r_i) \geq \gamma$ . For  $\epsilon > 0$  define  $\tilde{w}_y = (w_y, \sqrt{\epsilon}) \in \mathbf{B}_{1+\epsilon}^{d+1}$ , and  $\tilde{r} = r/\sqrt{\epsilon}$ , and let  $\tilde{X} = (X \quad \tilde{r})$ . For every  $y \in \{\pm 1\}^m$  there is a vector  $t_y \in \mathbb{R}^m$  such that  $\forall i \in [m]$ ,  $\frac{1}{\gamma} t_y[i] y[i] \geq 1$ , and  $\frac{1}{\gamma} \tilde{X} \tilde{w}_y = \frac{1}{\gamma} t_y$ . As in the proof of necessity in Theorem 5.2, it follows that there exists  $\hat{w}_y \in \mathbf{B}_{1+\epsilon}^{d+1}$  such that  $\frac{1}{\gamma} \tilde{X} \hat{w}_y = y$ . Scaling  $y$  by  $\gamma$ , we get the claim of the theorem.  $\square$

Now, Let  $X$  be a  $m \times d$  matrix whose rows are a set of  $m$  points in  $\mathbb{R}^d$  which is  $\gamma$ -shattered. By Lemma A.1, for any  $\epsilon > 0$  there exists matrix  $\tilde{X}$  of dimensions  $m \times (d+1)$  such that the first  $d$  columns of  $\tilde{X}$  are the respective columns of  $X$ , and for all  $y \in \{\pm 1\}^m$ , there is a  $w_y \in \mathbf{B}_{1+\epsilon}^{d+1}$  such that  $\tilde{X}w_y = y$ . Since  $\mathcal{X}$  is  $(B^2, k)$ -limited, there exists an orthogonal projection matrix  $P$  of size  $d \times d$  and rank  $d - k$  such that  $\forall i \in [m]$ ,  $\|X_i' P\|^2 \leq B^2$ . Let  $\tilde{P}$  be the embedding of  $P$  in a  $(d+1) \times (d+1)$  zero matrix, so that  $\tilde{P}$  is of the same rank and projects onto the same subspace. The rest of the proof follows as in the body of the paper.

### A.3 Proof of Theorem 4.4

*Proof of Theorem 4.4.* Let  $\Sigma = \text{diag}(\lambda_1, \dots, \lambda_d)$  be the covariance matrix of  $D_X$ , where  $\forall i \in [d-1]$ ,  $\lambda_i \geq \lambda_{i-1}$ . Define  $\mathcal{X}_\alpha = \{x \in \mathbb{R}^d \mid \sum_{i=k_\gamma(D_X)+1}^d x[i]^2 \leq \alpha\}$ .

Let  $\{x_i\}_{i=1}^m$  be an i.i.d. sample of size  $m$  drawn from  $D_X$ . We will select  $\alpha$  such that the probability that the whole sample is contained in  $\mathcal{X}_\alpha$  is large.  $\mathbb{P}[\forall i \in [m], x_i \in \mathcal{X}_\alpha] = (1 - \mathbb{P}[x_i \notin \mathcal{X}_\alpha])^m$ . Let  $X \sim D_X$ . Then for all  $t > 0$ ,  $\mathbb{P}[X \notin \mathcal{X}_\alpha] = \mathbb{P}[\sum_{i=k_\gamma+1}^d X[i]^2 \geq \alpha] \leq \mathbb{E}[\exp(t \sum_{i=k_\gamma+1}^d X[i]^2)] \exp(-t\alpha)$ .

Let  $\lambda_{\max} = \lambda_{k_\gamma+1}$ . Define  $Y \in \mathbb{R}^d$  such that  $Y[i] = X[i] \sqrt{\frac{\lambda_{\max}}{\lambda_i}}$ . Then  $\sum_{i=k_\gamma+1}^d X[i]^2 = \sum_{i=k_\gamma+1}^d \frac{\lambda_i}{\lambda_{\max}} Y[i]^2$ , and by the definition of  $k_\gamma$ ,  $\sum_{i=k_\gamma+1}^d \frac{\lambda_i}{\lambda_{\max}} \leq \frac{k_\gamma}{\lambda_{\max}}$ . Thus, by Lemma A.2

$$\mathbb{E}[\exp(t \sum_{i=k_\gamma+1}^d X[i]^2)] \leq \max_i \mathbb{E}[\exp(3tY[i]^2)]^{[k_\gamma/\lambda_{\max}]}$$

For every  $i$ ,  $Y[i]$  is a sub-Gaussian random variable with moment  $B = \rho\sqrt{\lambda_{\max}}$ . By [12], Lemma 1.1.6,  $\mathbb{E}[\exp(3tY[i]^2)] \leq (1 - 6\rho^2\lambda_{\max}t)^{-\frac{1}{2}}$ , for  $t \in (0, (6\rho^2\lambda_{\max})^{-1})$ . Setting  $t = \frac{1}{12\rho^2\lambda_{\max}}$ ,

$$\mathbb{P}[X \notin \mathcal{X}_\alpha] \leq 2^{k_\gamma/\lambda_{\max}} \exp\left(-\frac{\alpha}{12\rho^2\lambda_{\max}}\right).$$

Thus there is a constant  $C$  such that for  $\alpha(\gamma) \triangleq C \cdot \rho^2(k_\gamma(D_X) + \lambda_{\max} \ln \frac{m}{\delta})$ ,  $\mathbb{P}[X \notin \mathcal{X}_{\alpha(\gamma)}] \leq 1 - \frac{\delta}{2m}$ . Clearly,  $\lambda_{\max} \leq k_\gamma(D_X)$ , and  $k_\gamma(\mathcal{X}_{\alpha(\gamma)}) \leq \alpha(\gamma)$ . Therefore, from Theorem 4.2, the  $\gamma$ -fat-shattering dimension of  $\mathcal{W}(\mathcal{X}_{\alpha(\gamma)})$  is  $O(\rho^2 k_\gamma(D_X) \ln \frac{m}{\delta})$ . Define  $D_\gamma$  to be the distribution such that  $\mathbb{P}_{D_\gamma}[(X, Y)] = \mathbb{P}_{D_X}[(X, Y) \mid X \in \mathcal{X}_{\alpha(\gamma)}]$ . By standard sample complexity bounds [16], for any distribution  $D$  over  $\mathbb{R}^d \times \{\pm 1\}$ , with probability at least  $1 - \frac{\delta}{2}$  over samples,  $\ell_m(\mathcal{A}, D) \leq \tilde{O}\left(\sqrt{\frac{F(\gamma/8, D) \ln \frac{1}{\delta}}{m}}\right)$ , where  $F(\gamma, D)$  is the  $\gamma$ -fat-shattering dimension of the class of linear functions with domain restricted to the support of  $D$  in  $\mathbb{R}^d$ . Consider  $D_{\gamma/8}$ . Since the support of  $D_{\gamma/8}$  is  $\mathcal{X}_{\alpha(\gamma/8)}$ ,  $F(\gamma/8, D_{\gamma/8}) \leq O(\rho^2 k_{\gamma/8}(D_X) \ln \frac{m}{\delta})$ . With probability  $1 - \delta$  over samples from  $D_X$ , the sample is drawn from  $D_{\gamma/8}$ . In addition, the probability of the unlabeled example to be drawn from  $\mathcal{X}_{\alpha(\gamma/8)}$  is larger than  $1 - \frac{1}{m}$ . Therefore  $\ell_m(\mathcal{A}, D) \leq \tilde{O}\left(\sqrt{\frac{\rho^2 k_{\gamma/8}(D_X) \ln \frac{m}{\delta}}{m}}\right)$ . Setting  $\delta = \epsilon/2$  and bounding the expected error, we get  $m(\epsilon, \gamma, D) \leq \tilde{O}\left(\frac{\rho^2 k_{\gamma/8}(D_X)}{\epsilon^2}\right)$ . Lemma 3.3 allows replacing  $k_{\gamma/8}$  with  $O(k_\gamma)$ .  $\square$

**Lemma A.2.** Let  $T_1, \dots, T_d$  be independent random variables such that all the moments  $\mathbb{E}[T_i^n]$  for all  $i$  are non-negative. Let  $\lambda_1, \dots, \lambda_d$  be real coefficients such that  $\sum_{i=1}^d \lambda_i = L$ , and  $\lambda_i \in [0, 1]$  for all  $i \in [d]$ . Then for all  $t \geq 0$

$$\mathbb{E}[\exp(t \sum_{i=1}^d \lambda_i T_i)] \leq \max_{i \in [d]} (\mathbb{E}[\exp(3t T_i)])^{[L]}.$$

*Proof.* Let  $T_i$  be independent random variables. Then, by Jensen's inequality,

$$\mathbb{E}[\exp(t \sum_{i=1}^d \lambda_i T_i)] = \prod_{i=1}^d \mathbb{E}[\exp(t \lambda_i T_i)] \leq \prod_{i=1}^d \mathbb{E}[\exp(t T_i \sum_{j=1}^d \lambda_j)]^{\frac{\lambda_i}{\sum_{j=1}^d \lambda_j}} \leq \max_{i \in [d]} \mathbb{E}[\exp(t T_i \sum_{j=1}^d \lambda_j)].$$

Now, consider a partition  $Z_1, \dots, Z_k$  of  $[d]$ , and denote  $L_j = \sum_{i \in Z_j} \lambda_i$ . Then by the inequality above,

$$\mathbb{E}[\exp(t \sum_{i=1}^d \lambda_i T_i)] = \prod_{j=1}^k \mathbb{E}[\exp(t \sum_{i \in Z_j} \lambda_i T_i)] \leq \prod_{j=1}^k \max_{i \in Z_j} \mathbb{E}[\exp(t T_i L_j)].$$

Let the partition be such that for all  $j \in [k]$ ,  $L_j \leq 1$ . There exists such a partition such that  $L_j < \frac{1}{2}$  for no more than one  $j$ . Therefore, for this partition  $L = \sum_{i=1}^d \lambda_i = \sum_{j \in [k]} L_j \geq \frac{1}{2}(k-1)$ . Thus  $k \leq 2L + 1$ .

Now, consider  $\mathbb{E}[\exp(t T_i L_j)]$  for some  $i$  and  $j$ . For any random variable  $X$

$$\mathbb{E}[\exp(tX)] = \sum_{n=0}^{\infty} \frac{t^n \mathbb{E}[X^n]}{n!}.$$

Therefore,  $\mathbb{E}[\exp(t T_i L_j)] = \sum_{n=0}^{\infty} \frac{t^n L_j^n \mathbb{E}[T_i^n]}{(n)!}$ . Since  $\mathbb{E}[T_i^n] \geq 0$  for all  $n$ , and  $L_j \leq 1$ , it follows that  $\mathbb{E}[\exp(t T_i L_j)] \leq \mathbb{E}[\exp(t T_i)]$ . Thus

$$\mathbb{E}[\exp(t \sum_{i=1}^d \lambda_i T_i)] \leq \prod_{j=1}^k \max_{i \in Z_j} \mathbb{E}[\exp(t T_i)] \leq \max_{i \in [d]} \mathbb{E}[\exp(t \sum_{j=1}^k T_i[j])],$$

where  $T_i[j]$  are independent copies of  $T_i$ .

It is easy to see that  $\mathbb{E}[\exp[\frac{1}{a} \sum_{i=1}^a X_i]] \leq \mathbb{E}[\exp[\frac{1}{b} \sum_{i=1}^b X_i]]$ , for  $a \geq b$  and  $X_1, \dots, X_a$  i.i.d. random variables. Since  $k \geq \lfloor \frac{L}{2} \rfloor$  it follows that

$$\mathbb{E}[\exp(t \sum_{i=1}^d \lambda_i T_i)] \leq \max_{i \in [d]} \mathbb{E}[\exp(t \sum_{j=1}^k T_i[j])] \leq \max_{i \in [d]} \mathbb{E}[\exp(t \frac{k}{\lfloor L \rfloor} \sum_{j=1}^{\lfloor L \rfloor} T_i[j])].$$

Since  $k \leq 2L + 1$  and all the moments of  $T_i[j]$  are non-negative, it follows that

$$\mathbb{E}[\exp(t \sum_{i=1}^d \lambda_i T_i)] \leq \max_{i \in [d]} \mathbb{E}[\exp(t(2 + \frac{1}{\lfloor L \rfloor}) \sum_{j=1}^{\lfloor L \rfloor} T_i[j])].$$

□

#### A.4 Proof of Theorem 5.2

the following lemma, which allows converting the representation of the Gram-matrix to a different feature space while keeping the separation properties intact. For a matrix  $M$ ,  $M^+$  denotes its pseudo-inverse. If  $(M'M)$  is invertible then  $M^+ = (B'B)^{-1}B'$ .

**Lemma A.3.** *Let  $X$  be an  $m \times d$  matrix such that  $XX'$  is invertible, and  $Y$  such that  $XX' = YY'$ . Let  $r \in \mathbb{R}^m$  be some real vector. If there exists a vector  $\tilde{w}$  such that  $Y\tilde{w} = r$ , then there exists a vector  $w$  such that  $Xw = r$  and  $\|w\| = \|P\tilde{w}\|$ , where  $P = Y'Y'^+ = Y'(YY')^{-1}Y$  is the projection matrix onto the sub-space spanned by the rows of  $Y$ .*

*Proof.* Denote  $K = XX' = YY'$ . Set  $T = Y'X'^+ = Y'K^{-1}X$ . Set  $w = T'\tilde{w}$ . We have  $Xw = XT'\tilde{w} = XX'K^{-1}Y\tilde{w} = Y\tilde{w} = r$ . In addition,  $\|w\| = w'w = \tilde{w}'TT'\tilde{w}$ . By definition of  $T$ ,  $TT' = Y'X'^+X^+Y = Y'K^+Y = Y'K^{-1}Y = Y'(YY')^{-1}Y = Y'Y'^+ = P$ . Since  $P$  is a projection matrix, we have  $P^2 = P$ . In addition,  $P = P'$ . Therefore  $TT' = PP'$ , and so  $\|w\| = \tilde{w}'PP'\tilde{w} = \|P\tilde{w}\|$ . □

The next lemma will allow us to prove that if a set is shattered at the origin, it can be separated with the exact margin.

**Lemma A.4.** *Let  $R = \{r_y \in \mathbb{R}^m \mid y \in \{\pm 1\}^m\}$  such that for all  $y \in \{\pm 1\}^m$  and for all  $i \in [m]$ ,  $r_y[i]y[i] \geq 1$ . Then  $\forall y \in \{\pm 1\}^m, y \in \text{conv}(R)$ .*

*Proof.* We will prove the claim by induction on the dimension  $m$ .

**Induction base:** For  $m = 1$ , we have  $R = \{(a), (b)\}$  where  $a \leq -1$  and  $b \geq 1$ . Clearly,  $\text{conv}R = [a, b]$ , and the two one-dimensional vectors  $(+1)$  and  $(-1)$  are in  $[a, b]$ .

**Induction step:** For a vector  $t = (t[1], \dots, t[m]) \in \mathbb{R}^m$ , denote by  $\bar{t}$  its projection  $(t[1], \dots, t[m-1])$  on  $\mathbb{R}^{m-1}$ . Similarly, for a set of vectors  $S \subseteq \mathbb{R}^m$ , let  $\bar{S} = \{\bar{s} \mid s \in S\} \subseteq \mathbb{R}^{m-1}$ . Define

$$\begin{aligned} Y_+ &= \{y \in \{\pm 1\}^m \mid y[m] = +1\} \\ Y_- &= \{y \in \{\pm 1\}^m \mid y[m] = -1\}. \end{aligned}$$

Let  $R_+ = \{r_y \mid y \in Y_+\}$ , and similarly for  $R_-$ . Then  $\bar{R}_+$  and  $\bar{R}_-$  satisfy the assumptions for  $R$  when  $m-1$  is substituted for  $m$ .

Let  $y^* \in \{\pm 1\}^m$ . We wish to prove  $y^* \in \text{conv}(R)$ . From the induction hypothesis we have  $\bar{y}^* \in \text{conv}(\bar{R}_+)$  and  $\bar{y}^* \in \text{conv}(\bar{R}_-)$ . Thus

$$\bar{y}^* = \sum_{y \in Y_+} \alpha_y \bar{r}_y = \sum_{y \in Y_-} \beta_y \bar{r}_y,$$

where  $\alpha_y, \beta_y \geq 0$ ,  $\sum_{y \in Y_+} \alpha_y = 1$ , and  $\sum_{y \in Y_-} \beta_y = 1$ . Let  $y_a^* = \sum_{y \in Y_+} \alpha_y r_y$  and  $y_b^* = \sum_{y \in Y_-} \beta_y r_y$ . We have that  $\forall y \in Y_+, r_y[m] \geq 1$ , and  $\forall y \in Y_-, r_y[m] \leq -1$ . Therefore,  $y_a^*[m] \geq 1$  and  $y_b^*[m] \leq -1$ . In addition,  $\bar{y}_a^* = \bar{y}_b^* = \bar{y}^*$ . Hence there is  $\gamma \in [0, 1]$  such that  $y^* = \gamma y_a^* + (1-\gamma)y_b^*$ . Since  $y_a^* \in \text{conv}(R_+)$  and  $y_b^* \in \text{conv}(R_-)$ , we have  $y^* \in \text{conv}(R)$ . □

*Proof of Theorem 5.2.* Let  $XX' = U\Lambda U'$  be the SVD of  $XX'$ , where  $U$  is an orthogonal matrix and  $\Lambda$  is a diagonal matrix. Let  $Y = U\Lambda^{\frac{1}{2}}$ . We have  $XX' = YY'$ . We show that the conditions are sufficient and necessary for the shattering of  $S$ .

**Sufficient:** Assume  $XX'$  is invertible. Then  $\Lambda$  is invertible, thus  $Y$  is invertible. For any  $y \in \{\pm 1\}^m$ , Let  $\tilde{w} = Y^{-1}y$ . We have  $Y\tilde{w} = y$ . In addition,  $\|\tilde{w}\|^2 = y'(YY')^{-1}y = y'(XX')^{-1}y \leq 1$ . Therefore, by Lemma A.3, there exists a separator  $w$  such that  $Xw = y$  and  $\|w\| = \|P\tilde{w}\| = \|\tilde{w}\|$ .

**Necessary:** If  $XX'$  is not invertible then the vectors in  $S$  are linearly dependent, thus by standard VC-theory [16]  $S$  cannot be shattered using linear separators. The first condition is therefore necessary. We assume  $S$  is 1-shattered at the origin and show that the second condition necessarily holds. Let  $L = \{r \mid \exists w \in \mathbf{B}_1^d, Xw = r\}$ . Since  $S$  is shattered, For any  $y \in \{\pm 1\}^m$  there exists  $r_y \in L$  such that  $\forall i \in [m], r_y[i]y[i] \geq 1$ . By Lemma A.4,  $\forall y \in \{\pm 1\}^m, y \in \text{conv}(R)$  where  $R = \{r_y \mid y \in \{\pm 1\}^m\}$ . Since  $L$  is convex and  $R \subseteq L$ ,  $\text{conv}(R) \subseteq L$ . Thus for all  $y \in \{\pm 1\}^m$ ,  $y \in L$ , that is there exists  $w_y \in \mathbb{R}^m$  such that  $Xw_y = y$  and  $\|w_y\| \leq 1$ . From Lemma A.3 we thus have  $\tilde{w}_y$  such that  $Y\tilde{w}_y = y$  and  $\|\tilde{w}_y\| = \|Pw_y\| \leq \|w_y\| \leq 1$ .  $Y$  is invertible, hence  $\tilde{w}_y = Y^{-1}y$ . Thus  $y'(XX')^{-1}y = y'(YY')^{-1}y = \|\tilde{w}_y\|^2 \leq 1$ .  $\square$

## A.5 Proof of Theorem 6.2

First, define:

- The unit sphere:  $S^{n-1} = \{x \in \mathbb{R}^n \mid \|x\|_2 = 1\}$ .
- An  $\epsilon$ -Net on the unit sphere: Denote by  $\mathcal{N}_n(\epsilon)$  a minimal-size  $\epsilon$ -Net for  $S^{n-1}$ , that is a set such that for all  $y \in S^{n-1}, \exists x \in \mathcal{N}_n(\epsilon)$  such that  $\|x - y\|_2 \leq \epsilon$ .

For  $\epsilon$ -Nets we have the following bound on their size:

**Proposition A.5** ([19], Proposition 2.1). *For any  $\epsilon > 0$ ,*

$$|\mathcal{N}_n(\epsilon)| \leq 2n(1 + \frac{2}{\epsilon})^{n-1}.$$

The proof of the theorem follows. It relies on several lemmas which are disclosed subsequently.

*Proof of Theorem 6.2.* Let  $\mathcal{N}_m(\epsilon)$  be an  $\epsilon$ -Net for the unit sphere as defined above. Then for any matrix  $A$  of dimensions  $m \times d$ ,

$$\lambda_m(AA') = \inf_{\|x\|_2=1} \|x'AA'x\|_2 = \inf_{\|x\|_2=1} \|A'x\|_2^2,$$

and  $\inf_{\|x\|_2=1} \|A'x\|_2 \geq \min_{x \in \mathcal{N}} \|A'x\|_2 - \epsilon \|A'\|_{2,2}$ .

We assume w.l.o.g. that  $\Sigma$  is not singular (otherwise the dimension of the space can be reduced appropriately), and let  $Y = X_m\Sigma^{-1}$ . Let  $\beta \leq (c - K\epsilon)^2$  where  $c, K, \epsilon$  are parameters to be fixed later, and let  $m = \beta L$ . Then

$$\begin{aligned} \mathbb{P}[\lambda_m(Y\Sigma Y') \leq m] &\leq \mathbb{P}[\inf_{\|x\|_2=1} \|\sqrt{\Sigma}Y'x\|_2 \leq (c - K\epsilon)\sqrt{L}] \\ &\leq \mathbb{P}[\min_{x \in \mathcal{N}(\epsilon)} \|\sqrt{\Sigma}Y'x\|_2 - \epsilon \|\sqrt{\Sigma}Y'\| \leq (c - K\epsilon)\sqrt{L}] \\ &\leq \mathbb{P}[\min_{x \in \mathcal{N}(\epsilon)} \|\sqrt{\Sigma}Y'x\|_2 \leq c\sqrt{L}] + \mathbb{P}[\|\sqrt{\Sigma}Y'\| \geq K\sqrt{L}]. \end{aligned}$$

Since  $Y_{ij}$  is sub-Gaussian with moment  $B$ ,  $\mathbb{E}[Y_{ij}^4] \leq 5B^4$  [12, Lemma 1.4]. Thus, by Lemma A.11, there are  $\alpha$  and  $\eta$  which depend only on  $B$  such that

$$\mathbb{P}_Y[\|\sqrt{\Sigma}Yx\|^2 \leq \alpha L] \leq \eta^L.$$

Therefore

$$\mathbb{P}[\min_{x \in \mathcal{N}(\epsilon)} \|\sqrt{\Sigma}Y'x\|_2 \leq \sqrt{\alpha L}] \leq \sum_{x \in \mathcal{N}_m(\epsilon)} \mathbb{P}_Y[\|\sqrt{\Sigma}Y'x\|_2 \leq \sqrt{\alpha L}] \leq |\mathcal{N}_m(\epsilon)|\eta^L.$$

We thus let  $c = \min(\sqrt{\alpha}, 1)$ .

By Lemma A.8, for any  $K$  and  $\rho$ ,

$$\mathbb{P}[\|\sqrt{\Sigma}Y\| \geq K\sqrt{L}] \leq 2|\mathcal{N}_m(\rho)||\mathcal{N}_d(\rho)| \exp(-\frac{(1-\rho)^4 K^2 L}{2B^2}).$$

Combining the inequalities and setting  $m = \beta L$ ,

$$\begin{aligned} \mathbb{P}[\lambda_m(Y\Sigma Y') \leq m] &\leq |\mathcal{N}_m(\epsilon)|\eta^L + 2|\mathcal{N}_m(\rho)||\mathcal{N}_d(\rho)| \exp(-\frac{(1-\rho)^4 K^2 L}{2B^2}) \\ &\leq 2\beta L(1 + \frac{2}{\epsilon})^{\beta L-1}\eta^L + 4\beta L^2(1 + \frac{2}{\rho})^{(1+\beta)L-1} \exp(-\frac{(1-\rho)^4 K^2 L}{2B^2}), \end{aligned}$$

where the last inequality follows from Proposition A.5.

Fix  $\rho = \frac{1}{2}$ . Let  $K$  be a constant large enough such that for all  $\beta < 1$ , and for all  $L \geq L_0$  (where  $L_0 > 0$  is arbitrary)

$$4\beta L^2(1 + \frac{2}{\rho})^{(1+\beta)L-1} \exp(-\frac{(1-\rho)^4 K^2 L}{2B^2}) \leq \frac{1}{2} - \delta/2.$$

Let  $\epsilon = c/2K$ , so that  $c - K\epsilon > 0$ , and let  $\beta$  such that for all  $L > L_0$ ,

$$2\beta L(1 + \frac{2}{\epsilon})^{\beta L-1}\eta^L \leq \frac{1}{2} - \delta/2.$$

Then for the chosen  $\beta$ , and for any  $L > L_0$ ,

$$\mathbb{P}[\lambda_m(Y\Sigma Y') \geq m] \geq 1 - \delta.$$

□

The following easy to prove facts are found in several places in the literature:

**Proposition A.6** (See e.g. [22]). *For any linear operator  $A : \mathbb{R}^m \rightarrow \mathbb{R}^d$ ,*

$$\|A\| \leq \frac{1}{1-\epsilon} \sup_{x \in \mathcal{N}_m(\epsilon)} \|Ax\|.$$

**Proposition A.7** (See e.g. [19], proof of Proposition 2.2). *For any linear operator  $A : \mathbb{R}^m \rightarrow \mathbb{R}^d$ , and any  $x \in \mathbb{R}^m$ ,*

$$\|Ax\| \leq \frac{1}{1-\epsilon} \sup_{y \in \mathcal{N}_d(\epsilon)} \langle Ax, y \rangle.$$

In [19] this fact appears using the absolute value of  $\langle Ax, y \rangle$ , but the version above can be proved in the same manner.

The following is a variation on Prop 2.3 in [19].

**Lemma A.8.** *Let  $Y$  be a  $d \times m$  matrix with  $m \leq d$ , such that  $Y_{ij}$  are independent sub-Gaussian variables with moment  $B$ . Let  $\Sigma = \text{diag}(\lambda_1, \dots, \lambda_d)$  be a diagonal  $d \times d$  matrix with  $\lambda_i \in [0, 1]$  for all  $i$ . Then for all  $t \geq 0$ ,*

$$\mathbb{P}[\|\sqrt{\Sigma}Y\| \geq t] \leq 2|\mathcal{N}_m(\epsilon)||\mathcal{N}_d(\epsilon)| \exp(-\frac{1}{2} \frac{(1-\epsilon)^4 t^2}{B^2}).$$

*Proof.* From Proposition A.6 it follows that

$$\|\sqrt{\Sigma}Y\| \leq \frac{1}{1-\epsilon} \sup_{x \in \mathcal{N}_m(\epsilon)} \|\sqrt{\Sigma}Yx\|.$$

Therefore

$$\mathbb{E}[\exp(t\|\sqrt{\Sigma}Y\|)] \leq \mathbb{E}[\exp(\frac{t}{1-\epsilon} \sup_{x \in \mathcal{N}_m(\epsilon)} \|\sqrt{\Sigma}Yx\|)] \leq \sum_{x \in \mathcal{N}_m(\epsilon)} \mathbb{E}[\exp(\frac{t}{1-\epsilon} \|\sqrt{\Sigma}Yx\|)].$$

Now, let  $x \in \mathcal{N}_m(\epsilon)$ . From Proposition A.7,

$$\begin{aligned}\mathbb{E}[\exp(t\|\sqrt{\Sigma}Yx\|)] &\leq \mathbb{E}[\exp(\frac{t}{1-\epsilon} \sup_{y \in \mathcal{N}_d(\epsilon)} \langle \sqrt{\Sigma}Yx, y \rangle)] \\ &\leq \sum_{y \in \mathcal{N}_d(\epsilon)} \mathbb{E}[\exp(\frac{t}{1-\epsilon} \langle \sqrt{\Sigma}Yx, y \rangle)].\end{aligned}$$

For any  $x \in S^{m-1}, y \in S^{d-1}$ ,

$$\begin{aligned}\mathbb{E}[\exp(t\langle \sqrt{\Sigma}Yx, y \rangle)] &= \mathbb{E}[\exp(t \sum_{i=1}^d \sum_{j=1}^m \sqrt{\lambda_i} Y_{ij} x_j y_i)] = \prod_{i=1}^{d,m} \mathbb{E}[\exp(t \sqrt{\lambda_i} Y_{ij} x_j y_i)] \\ &\leq \prod_{i=1}^{d,m} \exp(\frac{1}{2} B^2 t^2 x_j^2 \lambda_i y_i^2) = \exp(\frac{1}{2} B^2 t^2 \sum_{j=1}^m x_j^2 \sum_{i=1}^d \lambda_i y_i^2) \leq \exp(\frac{1}{2} B^2 t^2),\end{aligned}$$

where the last inequality follows from the facts  $\|x\|^2 = 1, \|y\|^2 = 1$ , and  $\forall i \in [d] \lambda_i \leq 1$ . It follows that

$$\mathbb{E}[\exp(t\|\sqrt{\Sigma}Yx\|)] \leq |\mathcal{N}_d(\epsilon)| \exp(\frac{1}{2} \frac{B^2 t^2}{(1-\epsilon)^2})$$

Thus, for all  $t \in \mathbb{R}$ ,

$$\mathbb{E}[\exp(t\|\sqrt{\Sigma}Y\|)] \leq |\mathcal{N}_m(\epsilon)| |\mathcal{N}_d(\epsilon)| \exp(\frac{1}{2} \frac{B^2 t^2}{(1-\epsilon)^4}).$$

By Chernoff's method, for all  $t \geq 0$

$$\mathbb{P}[\|\sqrt{\Sigma}Y\| \geq t] \leq 2|\mathcal{N}_m(\epsilon)| |\mathcal{N}_d(\epsilon)| \exp(-\frac{1}{2} \frac{(1-\epsilon)^4 t^2}{B^2}).$$

□

The following lemma is a variation of [20], Lemma 2.6.

**Lemma A.9.** *Let  $Y$  be a  $d \times m$  matrix with  $m \leq d$ , such that the columns of  $Y$  are i.i.d. random vectors. Assume further that  $\forall i \in [d], j \in [m] \mathbb{E}[Y_{ij}] = 0, \mathbb{E}[Y_{ij}^2] = 1$  and  $\mathbb{E}[Y_{ij}^4] \leq B$  for some real number  $B$ . Let  $\Sigma = \text{diag}(\lambda_1, \dots, \lambda_d)$  be a diagonal  $d \times d$  matrix such that  $\forall i \in [d] \lambda_i \geq 0$  and  $\text{trace}(\Sigma) \leq L$ . Then for every  $x \in S^{m-1}$ ,*

$$\mathbb{P}[\|\sqrt{\Sigma}Yx\|_2^2 \leq \frac{L}{2}] \leq 1 - \frac{1}{196B}.$$

*Proof.* Let  $T_i = (\sum_{j=1}^m Y_{ij} x_j)^2$ , and let  $T_\Sigma = \|\sqrt{\Sigma}Yx\|_2^2 = \sum_{i=1}^d \lambda_i T_i$ .

First, since  $\mathbb{E}[Y_{ij}] = 0$  and  $\mathbb{E}[Y_{ij}^2] = 1$  for all  $i, j$ ,

$$\mathbb{E}[T_i] = \sum_{j=1}^m x_j^2 \mathbb{E}[Y_{ij}^2] = \|x\|_2^2 = 1.$$

Therefore  $\mathbb{E}[T_\Sigma] = L$ .

Second, since  $Y_{i1}, \dots, Y_{im}$  are independent, we can use a symmetrization argument as done in [20], proof of Lemma 2.6, to get

$$\mathbb{E}[T_i^2] = \mathbb{E}[(\sum_{j=1}^m Y_{ij} x_j)^4] \leq 16B_4 B = 48B,$$

Where  $B_4 = 3$  is the upper Khinchine constant for  $p = 4$  [23]. Thus,

$$\begin{aligned}\mathbb{E}[T_\Sigma^2] &= \mathbb{E}[(\sum_{i=1}^d \lambda_i T_i)^2] = \sum_{i,j=1}^d \lambda_i \lambda_j \mathbb{E}[T_i T_j] \\ &\leq \sum_{i,j=1}^d \lambda_i \lambda_j \mathbb{E}[T_i^2]^{\frac{1}{2}} \mathbb{E}[T_j^2]^{\frac{1}{2}} \leq 48B (\sum_{i=1}^d \lambda_i)^2 = 48BL^2,\end{aligned}$$

Where we have used the fact that  $\mathbb{E}[XY]^2 \leq \mathbb{E}[X^2]\mathbb{E}[Y^2]$  for any two random variables  $X$  and  $Y$ .  
By the Paley-Zigmond inequality [24], if  $0 < \theta < 1$ ,

$$\mathbb{P}[T_\Sigma \geq \theta \mathbb{E}[T_\Sigma]] \geq (1 - \theta)^2 \frac{\mathbb{E}[T_\Sigma]^2}{\mathbb{E}[T_\Sigma^2]} \geq \frac{(1 - \theta)^2}{48B}.$$

Therefore, setting  $\theta = 1/2$ ,

$$\mathbb{P}[T_\Sigma \leq \frac{L}{2}] \leq 1 - \frac{1}{196B}.$$

□

We also use the following lemma:

**Lemma A.10** (Lemma 2.2 item (2) in [20]). *Let  $T_1, \dots, T_n$  be independent non-negative random variables. Assume that there exists  $\theta > 0$  and  $\mu \in (0, 1)$  such that for any  $i$   $\mathbb{P}[T_i \leq \theta] \leq \mu$ . Then there exist  $\alpha > 0$  and  $\eta \in (0, 1)$  that depend only on  $\theta$  and  $\mu$  such that*

$$\mathbb{P}(\sum_{i=1}^n T_i < \alpha n) \leq \eta^n.$$

The following lemma is used in the proof of the theorem above.

**Lemma A.11.** *Let  $Y$  be a  $d \times m$  matrix with  $m \leq d$ , such that  $Y_{i,j}$  are independent centered random variables with variance 1 and fourth moments no more than  $B$ . Let  $\Sigma = \text{diag}(\lambda_1, \dots, \lambda_d)$  be a diagonal  $d \times d$  matrix with  $\lambda_i \leq 1$  for all  $i$ , and let  $L = \sum_{i=1}^d \lambda_i$ . Let  $x \in \mathbb{R}^m$  be a vector such that  $\|x\|_2 = 1$ . Then there exist  $\alpha > 0$  and  $\eta \in (0, 1)$  that depend only on  $B$  such that*

$$\mathbb{P}_Y[\|\sqrt{\Sigma}Yx\|^2 \leq \alpha L] \leq \eta^{2L}.$$

*Proof.* Consider a partition  $Z_1, \dots, Z_k$  of  $[d]$ , and denote  $L_j = \sum_{i \in Z_j} \lambda_i$ . Let the partition be such that for all  $j \in [k]$ ,  $L_j \leq 1$ . There exists such a partition such that  $L_j > \frac{1}{2}$  for all but at most one  $j$ . Therefore, for this partition  $L = \sum_{i=1}^d \lambda_i = \sum_{j \in [k]} L_j \geq \frac{1}{2}(k - 1)$ . Thus  $k \leq 2L + 1$ .

Let  $\Sigma[j]$  be the diagonal matrix whose diagonal elements are  $\lambda_i$  such that  $i \in Z_j$ , and let  $Y[j]$  be the sub-matrix of  $Y$  which includes only the lines whose indexes are in  $Z_j$ .

Then

$$\|\sqrt{\Sigma}Yx\|^2 = \sum_{i=1}^d \lambda_i (\sum_{j=1}^m Y_{ij}x_j)^2 = \sum_{j \in [k]} \sum_{i \in Z_j} \lambda_i (\sum_{j=1}^m Y_{ij}x_j)^2 = \sum_{j \in [k]} \|\Sigma[j]Y[j]x\|^2.$$

By Lemma A.9,  $\mathbb{P}[\|\Sigma[j]Y[j]x\|^2 \leq \frac{L_j}{2}] \leq 1 - \frac{1}{196B}$ .

Let  $J = \{j \in [k] \mid L_j > \frac{1}{2}\}$ . For all  $j \in J$ ,

$$\mathbb{P}[\|\Sigma[j]Y[j]x\|^2 \leq \frac{1}{4}] \leq 1 - \frac{1}{196B}.$$

In addition,  $|J| \geq L$ . Therefore, by Lemma A.10 there are  $\alpha > 0$  and  $\eta \in (0, 1)$  that depend only on  $B$  such that

$$\begin{aligned} \mathbb{P}[\|\sqrt{\Sigma}Yx\|^2 < \alpha L] &\leq \mathbb{P}[\|\sqrt{\Sigma}Yx\|^2 < \alpha |J|] \\ &\leq \mathbb{P}[\sum_{j \in J} \|\Sigma[j]Y[j]x\|^2 < \alpha |J|] \leq \eta^{|J|} \leq \eta^L. \end{aligned}$$

□
